1 ***Salmonella*-vectored vaccine delivering three *Clostridium perfringens* antigens**  
2 **protects poultry against necrotic enteritis.**

3

4 Authors

5 Shyra Wilde<sup>#a</sup>, Yanlong Jiang<sup>#b</sup>, Amanda M. Tafoya, Jamie Horsman, Miranda Yousif,  
6 Luis Armando Vazquez and Kenneth L. Roland\*

7

8 Center for Immunotherapy, Vaccines and Virotherapy, The Biodesign Institute, Arizona  
9 State University, Tempe, Arizona, United States of America

10

11 <sup>#a</sup>Current address: Department of Microbiology and Immunology, Emory University,  
12 Atlanta, Georgia, United States of America

13 <sup>#b</sup>Current address: College of Animal Science and Technology, Jilin Provincial  
14 Engineering Research Center of Animal Probiotics, Key Laboratory of Animal  
15 Production and Product Quality Safety of Ministry of Education, Jilin Agricultural  
16 University, Changchun, 130118, China

17

18 \*Corresponding author – Kenneth L. Roland

19 Email: [kenneth.roland@asu.edu](mailto:kenneth.roland@asu.edu)

20

21 Short title – Necrotic enteritis vaccine

22

23 **Abstract**

24 Necrotic enteritis is an economically important poultry disease caused by the bacterium  
25 *Clostridium perfringens*. There are currently no necrotic enteritis vaccines available for  
26 use in broiler birds, the most important target population. *Salmonella*-vectored vaccines  
27 represent a convenient and effective option for controlling this disease. We used a  
28 single attenuated *Salmonella* vaccine strain, engineered to lyse within the host, to  
29 deliver up to three *C. perfringens* antigens. Two of the antigens were toxoids, based on  
30 *C. perfringens*  $\alpha$ -toxin and NetB toxin. The third antigen was fructose-1,6-bisphosphate  
31 aldolase (Fba), an metabolic enzyme with an unknown role in virulence. Oral  
32 immunization with a single *Salmonella* vaccine strain producing either Fba,  $\alpha$ -toxoid and  
33 NetB toxoid, or all three antigens, was immunogenic, inducing serum, cellular and  
34 mucosal responses against *Salmonella* and the vectored *C. perfringens* antigens. All  
35 three vaccine strains were protective against virulent *C. perfringens* challenge. The  
36 strains delivering Fba only or all three antigens provided the best protection. We also  
37 demonstrate that both toxins and Fba are present on the *C. perfringens* cell surface.  
38 The presence of Fba on the cell surface suggests that Fba may function as an adhesin.  
39

40

## 41 **Introduction**

42

43           Keeping our food supply safe is one of many challenges facing the agriculture  
44 industry. When rearing poultry, maintenance of a healthy flock requires a multi-faceted  
45 strategy that includes good husbandry, strong biosecurity practices, proper feed  
46 formulation, vaccination, and veterinary care. One element of poultry rearing has been  
47 the inclusion of sub-clinical amounts of antibiotics in the feed to promote growth.  
48 Recent concerns regarding the impact of this practice on increasing antibiotic resistance  
49 in human pathogens has led to stricter regulations governing antibiotic use in food  
50 animals and voluntary elimination of antibiotics by poultry producers and food providers.  
51 While limiting the use of antibiotics on the farm may have long-range health benefits for  
52 the human population, it leads to additional challenges for the poultry industry. Based  
53 on results in other countries, it is well known that the incidence of necrotic enteritis (NE)  
54 caused by *Clostridium perfringens* type A strains increases when antibiotics are  
55 removed from the feed [1].

56           NE is an enteric disease causing chronic mucosal damage to the intestines with  
57 a range of symptoms including general poor health, reduced appetite, reduced weight  
58 gain, poor digestion and cholangiohepatitis. More severe symptoms, such as sudden  
59 death, can also occur in afflicted flocks. There are often no overt symptoms of  
60 pathology. Subacute infections are the most common, resulting in economic losses,  
61 due to the reduced weight of the birds, and carcass condemnation, due to liver lesions,  
62 after slaughter [2]. There are many predisposing factors, which include feed

63 composition, stress, coccidiosis, and immunosuppression due to infection with certain  
64 viruses [3]. This disease is estimated to cause annual global losses of up to \$6 million  
65 dollars to poultry producers.

66 Vaccination is one practical alternative to antibiotics. In a previous report, we  
67 used a novel *Salmonella* Typhimurium vaccine vector to deliver two relevant clostridial  
68 toxoid antigens, PlcC, a nontoxic carboxyterminal fragment of  $\alpha$ -toxin, and a GST-NetB  
69 fusion protein [4]. NetB is a pore-forming toxin that plays a central role in NE [5].  
70 Although the role of  $\alpha$ -toxin in pathogenesis is not clear, anti- $\alpha$ -toxin antibodies are  
71 protective [6], possibly due to their ability to inhibit *C. perfringens* growth [7]. The *S.*  
72 Typhimurium vaccine strain we used was engineered to display a near wild-type  
73 phenotype at the time of immunization. After several rounds of replication in host  
74 tissues, the strain lyses, releasing the *C. perfringens* antigens. This type of attenuated  
75 strain is called a lysis strain [8]. Immunization with the lysis strain delivering PlcC and  
76 GST-NetB was previously shown to elicit protective immunity against *C. perfringens*  
77 challenge [4].

78 Fructose-1,6-bisphosphate aldolase (Fba) was previously identified as an  
79 immunogenic protein in the supernatant of a virulent NE strain [9]. Chickens injected  
80 with recombinant Fba were partially protected against NE after challenge with *C.*  
81 *perfringens* [10]. In this work, we provide evidence that Fba is present on the surface of  
82 *C. perfringens* and evaluate the efficacy of Fba delivered by a *Salmonella* lysis strain  
83 with or without co-delivery of PlcC and NetB. We demonstrate that all three antigens  
84 can be effectively delivered by a single *Salmonella* lysis strain, eliciting strong mucosal  
85 and cellular responses. Inclusion of Fba enhanced protection against NE.

86

87

## 88 **Results**

89 **Characterization of *Salmonella* vaccine strains.** All *S. Typhimurium* vaccine strains  
90 required arabinose for growth (data not shown) and had similar growth characteristics in  
91 LB broth (0.1% arabinose, 0.1% mannose) (**Fig. S1**). Production of PlcC, GST-NetB  
92 and Fba by the various *Salmonella* vaccine strains were assessed by western blot. The  
93 strain carrying pYA5130 (*plcC fba GST-netB*) produced Fba at levels similar to the  
94 strain producing Fba alone (**Fig. 1**) and produced GST-NetB at levels similar to the  
95 strain carrying pYA5112 (*plcC GST-netB*). The strain carrying pYA5112 (*plcC GST-*  
96 *netB*) produced about 6-fold more PlcC than the strain carrying pYA5130 (*plcC fba GST-*  
97 *netB*) (**Fig. 1**). This is not surprising, as the *plcC* leader sequence in pYA5112 was  
98 modified to increase PlcC synthesis [4], while the *plcC* gene in pYA5130 does not carry  
99 that modification.

100

101 **Figure 1.** Antigen production by vaccine strains as determined by western blot.

102 Vaccine strains were grown in LB as described in Materials and Methods. Antigen  
103 production was induced by the addition of IPTG four hours prior to harvest. Membranes  
104 were probed with the indicated anti-sera. Predicted mass of antigens are: PlcC, 18kDa;  
105 GST-NetB, 59 kDa; Fba, 30 kDa. Lane 1, *Salmonella* vector control; Lane 2, *Salmonella*  
106 strain carrying pYA5130 (*plcC, fba, netB*); Lane 3, *Salmonella* strain carrying pYA5112  
107 (*plcC, netB*); Lane 4, *Salmonella* strain carrying pKR023 (*fba*).

108

109 **Serum antibody responses.** In experiment 1, the triple antigen vaccine elicited a  
110 significant increase in anti-Fba serum IgY titers when compared to the double-antigen  
111 vaccine or vector control ( $P < 0.0001$ ) (**Fig. 2A**). Modest increases in anti-PlcC and  
112 anti-NetB responses were observed, although only the anti-NetB responses elicited by  
113 the triple antigen vaccine achieved significance ( $P < 0.02$ ). In experiments 2 and 3,  
114 birds received 10-fold higher vaccine doses. Results from experiments 2 and 3 were  
115 similar and the data were combined for analysis. In this case, the anti-Fba serum IgY  
116 titers were 14 – 21-fold greater than controls, which was significant (**Fig. 2B**;  $P < 0.02$ ).  
117 We observed similar, significant increases in anti-NetB titers in birds immunized with  
118 *Salmonella* vaccines producing NetB ( $P < 0.05$ ). Despite the difference in PlcC  
119 production by strains carrying pYA5112 and pYA5130 (Fig. 1), the serum responses  
120 elicited by the two strains were comparable in both experiments (Fig. 2). However,  
121 though we observed increased anti-PlcC titers in birds immunized with strains producing  
122 PlcC, the increases were not statistically significant. This result is consistent with  
123 results from our previous study in which we observed poor seroconversion to PlcC  
124 when delivered by the same double antigen strain [4]. The anti-*Salmonella* LPS titers  
125 in immunized birds were 8 – 32-fold higher than controls ( $P < 0.0001$ ) (**Fig. 2B**).

126

127 **Figure 2.** Serum antibodies against *C. perfringens* and *Salmonella* antigens in  
128 vaccinated and non-vaccinated birds as determined by ELISA. (A) Experiment 1; (B)  
129 Experiments 2/3. Differences in responses compared to non-vaccinates and vector-  
130 only controls are indicated \*,  $P < 0.0001$ ; \*\*,  $P < 0.02$ . LPS responses were compared  
131 to non-vaccinated controls.

132

133 **Mucosal IgA, IgM and IgY responses.** We examined intestinal mucosal responses in  
134 experiments 2 and 3 and have combined the data. The vaccine elicited strong,  
135 significant mucosal responses to all antigens, including PlcC, although statistically  
136 significant responses against every antigen were not observed for all isotypes (**Fig. 3**).  
137 The mucosal IgA responses against PlcC were not significant for either strain delivering  
138 PlcC, while mucosal IgM responses elicited by both strains were significant. The anti-  
139 PlcC mucosal IgY response was only significant for the strain delivering two antigens.

140

141 **Figure 3.** Mucosal antibody responses to the indicated *C. perfringens* proteins and  
142 *Salmonella* LPS as determined by ELISA. (A) Experiment 1; (B) Experiments  
143 2/3. Differences in responses compared to non-vaccinates and vector-only controls are  
144 indicated by \*,  $P < 0.0001$ ; \*\*,  $P < 0.02$ . LPS responses were compared to non-  
145 vaccinated controls.

146

147 Birds immunized with the strain delivering only Fba achieved significant anti-Fba  
148 mucosal responses across all isotypes ( $P < 0.02$ ). The anti-Fba IgM and IgA responses  
149 were significant in birds immunized with the triple antigen strain. The anti-Fba IgY  
150 responses, while elevated, were not significant ( $P = 0.20$ ). All immunized birds  
151 produced elevated anti-NetB responses, although the anti-NetB IgA responses in birds  
152 that received the triple antigen strain did not achieve significance ( $P = 0.08$ )

153 **Cellular responses.** Immunization with the vaccine producing all three antigens elicited  
154 strong anti-Fba and anti-PlcC cellular responses in blood lymphocytes and splenocytes

155 **(Fig. 4).** Significant anti-NetB responses were observed in the splenocytes of birds  
156 receiving the triple antigen strain ( $P < 0.05$ ), but not in lymphocytes. Birds immunized  
157 with the strain producing two antigens, PlcC and NetB, produced significant anti-NetB  
158 responses in splenocytes ( $P < 0.005$ ) and significant anti-PlcC responses in  
159 lymphocytes ( $P < 0.05$ ). Birds immunized with the strain producing Fba alone exhibited  
160 significant cellular responses in splenocytes ( $P < 0.0001$ ), while the response in  
161 lymphocytes was not significant.

162

163 **Figure 4.** Cellular responses by splenocytes and lymphocytes from vaccinated and  
164 non-vaccinated chickens. Significant differences compared to controls are indicated.

165 \*,  $P < 0.0001$ ; #,  $P < 0.005$ , &,  $P < 0.05$ .

166

167 **Protection studies.** Protection against challenge was assessed by scoring intestinal  
168 lesions using a 6 point scoring system [11]. In experiment 1, birds immunized with  
169 either the double antigen strain or the triple antigen strain had significantly lower lesion  
170 scores than birds in the control groups (**Table 1**). There was no statistical difference  
171 between the average lesion scores for the triple antigen and double antigen strain  
172 groups ( $P = 0.25$ ) in this experiment.

173

174 **Table 1.** Intestinal lesion scores from Experiment 1

| Group                          | Number of birds with the indicated score |   |   |   |   |   |   | Av. score |
|--------------------------------|------------------------------------------|---|---|---|---|---|---|-----------|
|                                | 0                                        | 1 | 2 | 3 | 4 | 5 | 6 |           |
| <i>Salmonella</i> only (n = 8) | 0                                        | 2 | 2 | 2 | 2 | 0 | 0 | 2.5       |



|                                                 |   |   |   |   |   |   |   |       |
|-------------------------------------------------|---|---|---|---|---|---|---|-------|
| <i>plcC</i> , <i>netB</i> (n = 9)               | 3 | 1 | 5 | 0 | 1 | 0 | 0 | 1.5*  |
| <i>plcC</i> , <i>fba</i> , <i>netB</i> (n = 10) | 4 | 4 | 2 | 0 | 0 | 0 | 0 | 0.8** |
| NV <sup>#</sup> , challenged (n = 10)           | 0 | 0 | 3 | 4 | 3 | 0 | 0 | 3.0   |
| NV, non-challenged (n = 5)                      | 1 | 4 | 0 | 0 | 0 | 0 | 0 | 0.8   |

175

176 \**P* = 0.0055 vs non-vac

177 \*\**P* = 0.0001 vs non-vac

178 #NV – non-vaccinated

179

180

181 In experiment 3, we included a strain producing only Fba in addition to the strains  
 182 evaluated in experiment 1. Chickens immunized with any strain carrying *C. perfringens*  
 183 antigens had significantly lower lesion scores than non-vaccinated or *Salmonella* only  
 184 controls (**Table 2**), indicating protection against *C. perfringens* challenge. As in the  
 185 previous experiment, there were no statistical differences between the double antigen  
 186 and triple antigen groups (*P* = 0.19). However, there was a significant difference in  
 187 lesion scores between the Fba-only group and the double antigen group (*P* = 0.01),  
 188 indicating that Fba is contributing to protection against *C. perfringens* challenge.

189

190 **Table 2.** Intestinal lesion scores from Experiment 3

| Group                           | Number of birds with the indicated score |   |   |   |   |   |   | Av. score |
|---------------------------------|------------------------------------------|---|---|---|---|---|---|-----------|
|                                 | 0                                        | 1 | 2 | 3 | 4 | 5 | 6 |           |
| <i>Salmonella</i> only (n = 15) | 0                                        | 1 | 3 | 7 | 2 | 2 | 0 | 3.1       |

|                                 |   |   |   |   |   |   |   |        |
|---------------------------------|---|---|---|---|---|---|---|--------|
| <i>plcC, netB</i> (n = 14)      | 2 | 4 | 5 | 2 | 0 | 0 | 1 | 1.9*   |
| <i>plcC, fba, netB</i> (n = 17) | 5 | 6 | 4 | 2 | 0 | 0 | 0 | 0.9**  |
| <i>fba</i> (n = 16)             | 8 | 5 | 3 | 0 | 0 | 0 | 0 | 0.7**& |
| NV, challenged (n = 9)          | 0 | 0 | 1 | 2 | 4 | 0 | 2 | 4.0    |
| NV, non-challenged (n = 6)      | 3 | 3 | 0 | 0 | 0 | 0 | 0 | 0.5    |

191

192 \* $P = 0.0012$  vs non-vac,  $P = 0.0056$  vs *Salmonella* only group

193 \*\* $P < 0.0001$  vs non-vac or *Salmonella* only groups

194 & $P = 0.01$  vs *plcC, netB* group

195 There were no significant differences between any vaccinated group and the non-  
196 challenged controls.

197

198 **Plc, NetB and Fba are displayed on the surface of *C. perfringens*.** To  
199 evaluate the potential of rabbit antisera raised against rPlcC, rNetB and rFba to bind  
200 directly to *C. perfringens*, we used an immunofluorescence assay. Previous work  
201 showed that anti-PlcC antibodies bind to the surface of *C. perfringens* [7]. We  
202 confirmed this observation. Rabbit antibodies raised against rPlcC bound to challenge  
203 strain CP4 and another NE strain, JGS4143 (**Fig. 5**). Binding was dependent on the  
204 presence of  $\alpha$ -toxin, as no fluorescence was observed when we probed JGS5388, a  
205  $\Delta plc$  derivative of JGS4143. In addition, when purified rPlcC was mixed with the  
206 antisera prior to incubation with CP4, immunofluorescence was drastically reduced,  
207 indicating that fluorescence was mediated by anti- $\alpha$ -toxin-specific antibodies present in  
208 the serum. When we probed wild-type *C. perfringens* strains CP4 and JGS4143 with

209 anti-NetB antisera, we observed immunofluorescence. We also observed  
210 immunofluorescence using  $\Delta p/c$  strain JGS5388. However, no immunofluorescence  
211 was observed using the naturally occurring NetB<sup>-</sup> strain JGS4043 or when we mixed  
212 purified rNetB with the anti-NetB antisera prior to incubation with CP4 (**Fig. 5**, right  
213 column).

214

215 **Figure 5.** Indirect immunofluorescence detection of proteins on the surface of *C.*  
216 *perfringens*. *C. perfringens* strains were incubated with polyclonal sera from rabbits  
217 hyperimmunized with the indicated *C. perfringens* proteins. In the far right panel, sera  
218 were mixed with 1  $\mu$ g of the indicated proteins for 30 min prior to incubation with the *C.*  
219 *perfringens* strains.

220

221 Interestingly, Fba appears to be present on the cell surface as well, since we  
222 observed immunofluorescence of all strains when probed with anti-Fba antisera.  
223 Fluorescence was lost when the sera was pre-incubated with purified rFba (**Fig. 5**, right  
224 column). Incubation of *C. perfringens* with pre-immune sera or the secondary antibody  
225 alone did not result in immunofluorescence (**Fig. S2**). As an additional control, we  
226 incubated purified rFba with the anti-NetB antisera and rNetB with the anti-Fba antisera  
227 prior to probing *C. perfringens* CP4. These incubations did not diminish  
228 immunofluorescence (**Fig. S2**), indicating that protein-specific titration of each antibody  
229 was required to prevent its binding to *C. perfringens*. This result supports our  
230 interpretation that NetB and Fba are displayed on the surface of *C. perfringens*.

231 **NetB and Fba facilitate adherence to eukaryotic cells.** The presence of Fba on the  
232 *C. perfringens* cell surface raises the possibility that it plays a role in attachment to the  
233 host epithelium. To investigate the possible role of Fba in adherence, we examined the  
234 effect of pre-incubating Caco-2 cells with Fba prior to performing an attachment assay.  
235 As controls, we included wells in which either NetB or the *Streptococcus pneumoniae*  
236 protein PspA was substituted for Fba. Prior addition of Fba to the wells resulted in a  
237 significant reduction in adherence ( $P < 0.037$ ) (**Fig. 6**). We also found that NetB  
238 inhibited adherence as well ( $P < 0.002$ ). The irrelevant *S. pneumoniae* protein PspA  
239 had no effect. These results suggest a possible role for Fba and NetB in adherence to  
240 intestinal epithelial cells.

241

242 **Figure 6.** Adherence of *C. perfringens* CP4 to Caco-2 cells in the presence or absence  
243 of purified rFba, rNetB or rPspA. Attachment results significantly different from the no  
244 protein controls are indicated.

245

## 246 **Discussion**

247 Fba is an enzyme of the Embden-Meyerhof-Parnas glycolytic pathway that  
248 converts D-fructose-1,6-bisphosphate into D-glyceraldehyde-3-phosphate and  
249 dihydroxyacetone phosphate [12]. In *C. perfringens*, it also plays a role in the  
250 catabolism of *myo*-inositol [13] and is negatively regulated by the VirR/VirS two  
251 component system that also regulates production of a number of virulence factors  
252 including  $\alpha$ -toxin [14]. An enzyme important in central metabolism may seem to be an  
253 unusual choice for inclusion in a vaccine. However, in several organisms, Fba is

254 recognized as a “moonlighting protein”, one that can perform two or more autonomous  
255 functions [12]. Fba has been shown to serve as an adhesin in a number of dissimilar  
256 bacterial pathogens, including *S. pneumoniae* [15], *Mycobacterium tuberculosis* [16]  
257 and *Neisseria meningitidis* [17]. Our immunofluorescence data shows that a protein  
258 cross-reactive with anti-Fba antisera is present on the surface of *C. perfringens* (**Fig. 5**),  
259 a result consistent with a possible role for Fba as an adhesin in this organism. Our  
260 tissue culture results support this as well, as adherence to Caco-2 cells is inhibited in  
261 the presence of rFba (**Fig. 6**). However, the importance of this finding will need to be  
262 confirmed using a chicken epithelial cell line. Similarly, NetB appears to aid in  
263 adherence to epithelial cells. This is not surprising, since NetB is known to be toxic to  
264 both chicken and human cells. NetB may bind to host cells via interactions with  
265 cholesterol [18].

266 As a vaccine, immunization with the appropriate homologous Fba is partially  
267 protective against infection with *S. pneumoniae* [19], *S. pyogenes* [20] and the fish  
268 pathogen, *Edwardsiella tarda* [21]. In *C. perfringens*, Fba was previously identified as  
269 one of several secreted proteins recognized by sera taken from chickens with acquired  
270 immunity to necrotic enteritis [9]. In an initial assessment of its vaccine potential,  
271 chickens given a single intramuscular injection with recombinant Fba were well  
272 protected against a mild *C. perfringens* challenge [10]. Protection against a more  
273 severe challenge required multiple injections. Fba delivered by a non-lysis attenuated  
274 *S. Typhimurium* vaccine was also found to elicit partially protective immunity [22],  
275 although protection was not as effective as when it was delivered by intramuscular  
276 injection. In the current study, Fba delivered by an attenuated lysis *S. Typhimurium*

277 strain elicited the strongest protection, significantly better than the vaccine delivering the  
278 two toxoid antigens (**Table 2**). It is possible that, despite the careful strain design to  
279 prevent loss of immunogenicity due to antigen load, there is some stress on the vaccine  
280 strain delivering the two toxoid antigens, leading to lower immune responses against  
281 each antigen. However, in the triple antigen strain, this deficiency appears to be offset  
282 by the combined protective efficacy provided by each antigen. Although immunization  
283 with the strain delivering Fba alone yielded the lowest lesion scores, it is likely that the  
284 triple antigen strain will provide the broadest protection. This question will be examined  
285 in future experiments.

286 It is of interest that, in this study, we achieved anti-Fba serum IgY titers similar to  
287 the serum titers observed when Fba was delivered by a non-lysis strain [22].  
288 Conversely, delivery by lysis strain elicited much greater mucosal responses, indicating  
289 that mucosal immunity is more important than humoral immunity for protection against  
290 challenge.

291 Previous work demonstrated that anti-PlcC antibodies bound to the surface of *C.*  
292 *perfringens*, indicating the presence of  $\alpha$ -toxin [7]. We extended those observations to  
293 confirm that antibody binding did not occur in a  $\Delta plc$  mutant and that binding is reduced  
294 by incubation of antisera with purified PlcC (**Fig. 5**). Our data also indicate that NetB  
295 toxin is present on the surface of *C. perfringens*. The presence of all three antigens on  
296 the cell surface suggests that the anti-*C. perfringens* mucosal antibodies elicited by our  
297 vaccine may bind directly to *C. perfringens*, facilitating opsonization and/or inhibiting  
298 toxin secretion. If, as our data suggest, Fba serves as an adhesin for *C. perfringens*,  
299 anti-Fba antibodies bound to *C. perfringens* cells may serve to prevent close contact of

300 the bacterium with the host epithelium, an important step in pathogenesis [23, 24]. In  
301 addition, anti-PlcC antibodies were previously shown to inhibit *C. perfringens* growth  
302 directly, suggesting another mechanism for the action of these antibodies.

303 This work highlights the potential for a *Salmonella*-vectored vaccine to control  
304 NE. Our findings show that the *Salmonella* lysis vector strain  $\chi$ 11802 was capable of  
305 delivering up to three antigens simultaneously, generating humoral, cellular and  
306 mucosal responses against all antigens. In particular, this strain is able to generate  
307 strong mucosal responses as shown here and in a previous study [4]. Our results also  
308 support the idea that intestinal mucosal responses are an effective deterrent against  
309 lesion formation caused by *C. perfringens*.

310

## 311 **Materials and Methods**

312 **Animal care.** All animal experiments were conducted in compliance with the Arizona  
313 State University Institutional Animal Care and Use Committee and the Animal Welfare  
314 Act under protocol 16-1480R.

315 **Bacterial strains, plasmids and growth conditions.** Strains and plasmids used in  
316 this study are listed in **Table 3**. All vaccine strains were routinely cultured at 37°C with  
317 aeration. *Salmonella* were grown in Luria Broth (LB) (Bacto tryptone, 10 g/liter; Bacto  
318 yeast extract, 5 g/liter; NaCl, 10 g/liter) with aeration. When required, media were  
319 supplemented with ampicillin (Amp; 100 µg/mL), 2,6-diaminopimelic acid (DAP; 50  
320 µg/mL), L-arabinose (Ara; 0.1% v/v) or mannose (Man; 0.1% v/v). Media were solidified  
321 with 1.5% (wt/vol) agar as needed. Vaccine strains were supplemented with 0.1% Ara

322 in plates. *C. perfringens* was cultured anaerobically on blood agar plates, in cooked  
 323 meat medium (CMM; Difco) or in fluid thioglycollate medium (FTG; Difco) for challenge.

324

325 **Table 3. Strains and plasmids used in this study.**

| Strain or plasmid     | Genotype/characteristics                                                                                                                                                                                                      | Source or reference     |
|-----------------------|-------------------------------------------------------------------------------------------------------------------------------------------------------------------------------------------------------------------------------|-------------------------|
| <i>Salmonella</i>     |                                                                                                                                                                                                                               |                         |
| $\chi$ 11802          | $\Delta P_{murA25}::TT$ <i>araC</i> $P_{BAD}$ <i>murA</i> $\Delta asdA27::TT$<br><i>araC</i> $P_{BAD}$ <i>c2</i> $\Delta(wza-wcaM)-8$ $\Delta pmi-2426$<br>$\Delta relA198::araC$ $P_{BAD}$ <i>lacI</i> $TT$ $\Delta recF126$ | [4]                     |
| <i>C. perfringens</i> |                                                                                                                                                                                                                               |                         |
| CP4                   | Wild-type                                                                                                                                                                                                                     | [25]                    |
| JGS4143               | Wild-type                                                                                                                                                                                                                     | [26]                    |
| JGS5388               | JGS4143 $\Delta plc$                                                                                                                                                                                                          | G. Songer               |
| JGS4043               | NetB <sup>-</sup>                                                                                                                                                                                                             | [27]                    |
| <i>E. coli</i>        |                                                                                                                                                                                                                               |                         |
| MGN055                | $\phi 80d$ <i>lacZ</i> $\Delta M15$ <i>deoR</i> $\Delta(lacZYA-$<br><i>argF)U169</i> <i>supE44</i> <i>gyrA96</i> <i>recA1</i> <i>relA1</i><br><i>endA1</i> $\Delta asdA4$ $\Delta zhf-2::Tn10$ <i>hsdR17</i>                  | [28]                    |
| BL21(DE3)             | F <sup>-</sup> <i>ompT</i> <i>gal</i> <i>dcm</i> <i>lon</i> <i>hsdSB</i> (rB <sup>-</sup> mB <sup>-</sup> )<br>$\lambda$ (DE3 [ <i>lacI</i> <i>lacUV5-T7p07</i> <i>ind1</i> <i>sam7</i><br><i>nin5</i> ])                     | Promega, Madison,<br>WI |



|             |                                                        |            |
|-------------|--------------------------------------------------------|------------|
| M15 (pREP4) | □ <i>lacZM15 thi mtl</i> Kan <sup>R</sup>              | Qiagen     |
| Plasmids    |                                                        |            |
| pQE30       | Ap <sup>r</sup>                                        | Qiagen     |
| pKR023      | <i>fba</i> in pYA3681                                  | This study |
| pKR032      | <i>netB</i> in pQE30                                   | This study |
| pYA3493     | Non-lysis <i>asdA</i> plasmid vector                   | [29]       |
| pYA3681     | Lysis <i>asdA</i> , <i>murA</i> , plasmid vector       | [8]        |
| pYA4756     | Codon-optimized <i>fba</i> in pUC57                    | Genscript  |
| pYA5023     | <i>plcC</i> , <i>fba</i> , GST- <i>netB</i> in pYA3493 | This study |
| pYA5107     | His-tagged <i>fba</i> in pET30a                        | This study |
| pYA5112     | <i>plcC</i> , GST- <i>netB</i> in pYA3681              | [4]        |
| pYA5130     | <i>plcC</i> , <i>fba</i> , GST- <i>netB</i> in pYA3681 | This study |

326

327

328

329 **Plasmid constructions.** The *fba* gene, codon-optimized for expression in *Salmonella*,  
330 was synthesized by Genscript (Piscataway, NJ, USA). To construct plasmid pKR023,  
331 the *fba* gene was amplified from plasmid pYA4756 using primers Fba-KpnI-F:  
332 (TTGGGGTACCTCATGGCACTGGTTAACGCAAAG) and Fba-SacII:  
333 ATTACCGCGGCTATTAAGCTCTGTTTACTGA. Primers 3681-KpnI  
334 (TGGGGTACCAGATGGCACTGGTTAACGCAAAG) and 3681-SacII  
335 (ATTACCGCGGCTATTAAGCTCTGTTTACTGA) were used to introduce KpnI and  
336 SacII sites into pYA3681. The *fba* gene was cloned into pYA3681, electroporated into

337 *Escherichia coli* strain MGN055 and then subsequently moved into *S. Typhimurium*  
338 strain  $\chi$ 11802. To construct plasmid pYA5130, primers 5023-KpnI-F  
339 (CCATGGGGTACCAGATGAGTATTCAACATTTCCGT) and 5023-SacII  
340 (ATTACCGCGGTTACAGATAATATTTCGATTTTAATT) were used to amplify the *plcC-*  
341 *fba-Gst-netB* gene cassette from pYA5023. The purified PCR product was digested  
342 with KpnI and SacII. Primers 3681-KpnI and 3681-SacII were used to amplify the  
343 plasmid sequences from pYA3681. The purified PCR product was digested with KpnI  
344 and SacII. The two fragments were then ligated and electroporated into MGN055. A  
345 plasmid of the expected size and DNA sequence was designated pYA5130.

346 **Immunofluorescence assay.** To determine if antibodies against NetB, PlcC, and Fba  
347 bound to the bacterial cell surface, we performed an indirect immunofluorescence test.  
348 Several fresh colonies of *C. perfringens* from a Trypticase Soy Agar with 5% Sheep  
349 Blood plate (BD) were used to inoculate Brain Heart Infusion (BHI) Broth (BD). Cultures  
350 were grown for 24 h and harvested by centrifugation at 4000 X *g* for 15 min. Pelleted  
351 cells were resuspended with 10% formalin in phosphate buffered saline (PBS) and fixed  
352 by overnight incubation at 4°C with slow rotation. Fixed cells were pelleted,  
353 resuspended, and washed twice in PBS. 100 $\mu$ L of fixed cells were pelleted and blocked  
354 with 2% BSA for 1 h at room temperature with slow agitation. Cells were pelleted and  
355 resuspended in 200  $\mu$ L of control sera, anti-sera, anti-sera + antigen or control protein,  
356 or PBS (no sera control) diluted 1:50 in PBS and incubated overnight at 4°C with slow  
357 rotation. Cells were washed with PBS-0.1% Tween 20 and goat anti-chicken IgG  
358 antibody conjugated with fluorescein isothiocyanate (SouthernBiotech, Birmingham, AL)  
359 diluted 1:500 in PBS was added. The resulting cell suspension was incubated for 3 h at

360 room temperature with gentle agitation. Cells were washed 3 times with PBS-0.1%  
361 Tween 20, resuspended in PBS and mounted for observation under a Leica TCS SP5  
362 confocal microscope.

363 **Synthesis of recombinant antigens in  $\chi$ 11802.** To evaluate synthesis of PlcC, Fba  
364 and GST-NetB, overnight static cultures of *S. Typhimurium*  $\chi$ 11802 carrying plasmids  
365 pYA5112 (PlcC, GST-NetB), pYA5130 (PlcC, Fba, GST-NetB), pKR029 (Fba) or  
366 pYA3681 (empty vector) were inoculated into LB supplemented with 0.1% arabinose  
367 and 0.2% mannose and grown to an OD<sub>600</sub> of 0.6. Then, 1 mM isopropyl- $\beta$ -D-  
368 thiogalactopyranoside (IPTG) was added to each culture and induced for an additional 4  
369 h. The final cultures were adjusted to the same density using OD<sub>600</sub> values. Equal  
370 volumes of the adjusted samples were centrifuged at 16,000  $\times$  g for 5 min and the pellet  
371 was resuspended with 100  $\mu$ L sodium dodecyl sulfate (SDS)-loading buffer (100 mM  
372 Tris-HCl, pH6.8; 4% SDS; 0.2% bromophenol blue; 20% glycerol; 200 mM  $\beta$ -  
373 mercaptoethanol). The whole-cell lysates were subjected to SDS-polyacrylamide gel  
374 electrophoresis (SDS-PAGE) and western blot as described using polyclonal rabbit sera  
375 raised against the indicated antigens [4].

376 **Immunization of chickens.** Groups of one-day-old Cornish  $\times$  Rock broiler chickens  
377 were purchased from the Murray McMurray Hatchery (Webster City, IA). Chickens were  
378 divided into separate pens, with 16-20 chicks per group. On the day of arrival, three  
379 chicks were euthanized. Spleen and ceca were collected to confirm their *Salmonella*-  
380 free status. The shipping boxes were also swabbed. Tissues were homogenized in  
381 PBS and plated onto Brilliant Green plates for bacterial enumeration. Tissue samples  
382 and swabs were also enriched in Rappaport-Vassiliadis medium for 48 h at 37°C and

383 subsequently plated onto Brilliant Green. No *Salmonella* were detected in the birds nor  
384 in the shipping boxes. The following day (day 0, the birds were 4 days of age), all  
385 chicks were orally inoculated with approximately  $1 \times 10^8$  CFU (experiment 1) or  $1 \times 10^9$   
386 CFU (experiments 2 and 3) of various *S. Typhimurium* vaccine strains, including the  
387 vector-only control strain  $\chi$ 11802(pYA3681), in 100  $\mu$ L of PBS. Additional groups of  
388 control birds were not vaccinated. Thirty minutes later, the chicks were provided with  
389 feed and water. The same dose of the same strain was given as a boost immunization  
390 14 days later.

391 We performed three independent experiments. Intestinal mucosa samples and  
392 cellular response data were not collected in experiment 1 and the strain carrying  
393 pKR023 was not tested. In experiment 2, all vaccine strains were used and immune  
394 response data were collected, but no challenge was performed. In experiment 3, all  
395 strains were used and serum, mucosal and cellular response data were collected.

396 **Sample collection for analysis of immune responses.** To evaluate mucosal immune  
397 responses (experiments 2 and 3), intestinal samples were collected as described  
398 previously [30] with some modifications. Three birds from each group were necropsied  
399 at 19 (experiment 2) or 21 (experiment 3) days after the 1<sup>st</sup> immunization (6 days after  
400 the boost). The intestines were opened aseptically and the surface contents were  
401 removed gently using a clean paper wiper. Then, approximately 3 g of intestinal  
402 scrapings were collected using glass slides and resuspended in 30 mL of ice-cold PBS  
403 containing Pierce™ Protease Inhibitor Mini Tablets. After shaking for 1 min, the  
404 supernatants were collected by centrifugation at  $4000 \times g$  for 20 min at 4°C to evaluate  
405 intestinal IgA, IgY and IgM antibody production. Blood was collected from wing veins of

406 all remaining birds in each group at 21 days after the 1<sup>st</sup> immunization to assess the IgY  
407 antibody responses to *C. perfringens* and *Salmonella* antigens in serum.

408 **Determination of antibody response by enzyme-linked immunosorbent assay**

409 **(ELISA)**. ELISAs were performed in triplicate as described [31] to determine the IgY  
410 responses against his-tagged PlcC, his-tagged Fba, his-tagged NetB and *S.*

411 Typhimurium lipopolysaccharide (LPS) in chicken sera and IgA, IgY and IgM responses  
412 in intestinal washes. Biotinylated anti-chicken IgA (Alpha Diagnostic Intl. Inc), IgY  
413 (Southern Biotechnology) or IgM (Bioss) antibodies diluted 1:10,000 were used to  
414 detect the various antibody isotypes.

415 **Cellular proliferation assay**. A proliferation assay was performed to evaluate cell-  
416 mediated immunity. Twenty-one days post primary immunization, blood and spleens  
417 were harvested. Lymphocytes in the blood were harvested using the gentle swirl  
418 technique [32] and plated in quadruplicate, in a 96-well plate at 10<sup>5</sup> cells/well in RPMI-  
419 1640 without phenol red. Spleens were placed through a 70 µm cell strainer to obtain  
420 single cell suspensions. Red blood cells were lysed with Red Blood Cell Lysis solution  
421 (eBioscience). Splenocytes were then washed, suspended in RPMI and plated at 10<sup>6</sup>  
422 cells/well. Each set of cells was incubated at 37°C, 5% CO<sub>2</sub> for 72 h with or without 4  
423 µg/ml of either His-Fba, *S.* Typhimurium LPS, His-NetB, His-PlcC, or 1 µg/ml PMA. Cell  
424 proliferation was measured using the Vybrant®MTT Cell Proliferation Assay Kit  
425 (Molecular Probes). Mean absorbance value of antigen stimulated wells divided by  
426 mean absorbance of non-stimulated control wells was used to calculate stimulation  
427 index.

428 **Challenge with *C. perfringens*.** Chickens were fed an antibiotic-free starter feed  
429 containing 21% protein for 20 days, at which time the feed was switched to a high  
430 protein (28% protein), wheat-based feed containing 36% fish meal and zinc at 400 ppm  
431 (customized by Reedy Fork Farm, NC) to predispose the birds to necrotic enteritis [11,  
432 33]. Birds were challenged with virulent *C. perfringens* strain CP4 [25] in feed from day  
433 28 to day 32 as described [11] with some modifications. Feed was withdrawn on day 27  
434 for 15 h before challenge. On day 28, chickens were orally gavaged with 0.5 mL of an  
435 overnight culture of *C. perfringens* CP4 grown in CMM medium. Immediately after  
436 gavage, infected feed was provided thereafter for 5 consecutive days. To prepare  
437 infected feed, *C. perfringens* was grown in CMM medium for 24 h at 37°C, which then  
438 was inoculated into FTG medium at a ratio of 0.3% (v/v) and incubated at 37°C for 15 h  
439 (morning challenge) or 23 h (evening challenge). The *C. perfringens* culture was mixed  
440 with feed at a ratio of 1:1 (v/w). Infected feed was prepared freshly twice daily. All birds  
441 were euthanized and necropsied the day following the final challenge (day 33).

442 **Lesion scoring.** Protection against *C. perfringens* challenge was assessed on the  
443 basis of gross intestinal lesion scores at necropsy. On day 33, chickens were  
444 euthanized with CO<sub>2</sub> and their small intestines (defined here as the section between the  
445 gizzard and Meckel's diverticulum) were examined for visible gross lesions. Intestinal  
446 lesions were scored as follows: 0 = no gross lesions; 1 = thin or friable wall or diffuse  
447 superficial but removable fibrin; 2 = focal necrosis or ulceration, or non-removable fibrin  
448 deposit, 1 to 5 foci; 3 = focal necrosis or ulceration, or non-removable fibrin deposit, 6 to  
449 15 foci; 4 = focal necrosis or ulceration, or non-removable fibrin deposit, 16 or more foci;  
450 5 = patches of necrosis 2 to 3 cm long; 6 = diffuse necrosis typical of field cases [11].

451 **Attachment assay.** The human colon carcinoma cell line Caco-2 (ATCC® #HTB-37)  
452 were obtained from the American Type Culture Collection (Manassas, VA) and cultured  
453 in Dulbecco's' modified Eagle's medium (DMEM) with 4.5 g/L glucose (Corning,  
454 Manassas, VA) containing 4mM L-glutamine, 1% sodium pyruvate, 1% non-essential  
455 amino acids (NEEA), 100 U/ml penicillin, 100 µg/ml streptomycin, 20% heat inactivated  
456 fetal calf serum. Caco-2 cells were seeded at  $5 \times 10^5$  cells/mL in each well of a 24-well  
457 tissue culture plate. Cells were allowed to grow to a confluent monolayer for 48 hours.  
458 One hour prior to infection with CP4, media was replaced with antibiotic free DMEM.  
459 Then, 1 µg/ml of purified protein (his-FBA, his-NetB, or his-PspA) or PBS was added to  
460 the Caco-2 monolayer and incubated for 15 min at 37°C, 5% CO<sub>2</sub>. The bacterial  
461 inoculum was prepared as follows. CP4 cultures were grown anaerobically for 24 h in  
462 BHI broth inoculated from a fresh blood agar plate. Cultures were pelleted and  
463 resuspended in PBS to a target concentration of  $5 \times 10^5$  CFU/ 20 µL. Caco-2  
464 monolayers were infected with an MOI of 1:1 and then centrifuged for 3 min at 240 x g  
465 and incubated for 1 hour at 37°C, 5% CO<sub>2</sub>. To detach the Caco-2 monolayers, 200  
466 µL/well of 0.25% Trypsin-EDTA was added to each well. Once the monolayer cells  
467 detached, 800 µL/well of PBS was added. The trypsinized samples were serially diluted  
468 and plated onto blood agar plates for *C. perfringens* enumeration. All counts were  
469 normalized to the inoculum concentration and presented as percentage of the no  
470 protein control.

471 **Statistical analysis.** All statistics were carried out using GraphPad Prism 6.0 (Graph-  
472 Pad Software, San Diego, CA). Antibody titers and adherence data were analyzed  
473 using two-way or one-way ANOVA followed by Tukey's posttest, respectively. Lesion

474 scores were analyzed using a two-tailed Mann-Whitney test. The values were  
475 expressed as means  $\pm$  SEM, and differences were considered significant at  $P < 0.05$ .

476

#### 477 **Acknowledgements**

478 The authors wish to thank Jacquelyn Kilbourne, Larisa Gilley, Nyja Brown, Donovan  
479 Leigh, Penelope Roach and Melody Yeh for their expert technical assistance. We thank  
480 Dustin McAndrew, Randall Dalbey and the DACT staff at ASU for expert care and  
481 husbandry of our research animals.

482 **Competing interests.** KR is an inventor on US patent 8,465,755 and US patent  
483 9,040,059. All other authors declare no competing interests.

484 **Funding.** This project was supported by Agriculture and Food Research Initiative  
485 Competitive Grant no. 2016-67016-24947 from the United States Department of  
486 Agriculture, National Institute of Food and Agriculture and startup funds from Arizona  
487 State University to KR. The funders had no role in study design, data collection and  
488 analysis, decision to publish, or preparation of the manuscript

489

490

491

492



493 **References**

494

495

496 1. Van Immerseel F, Rood JI, Moore RJ, Titball RW. Rethinking our understanding  
497 of the pathogenesis of necrotic enteritis in chickens. Trends Microbiol. 2009;17(1):32-6.  
498 Epub 2008/11/04. doi: 10.1016/j.tim.2008.09.005. PubMed PMID: 18977143.

499 2. Timbermont L, Haesebrouck F, Ducatelle R, Van Immerseel F. Necrotic enteritis  
500 in broilers: an updated review on the pathogenesis. Av Pathol. 2011;40(4):341-7. doi:  
501 10.1080/03079457.2011.590967. PubMed PMID: 21812711.

502 3. Moore RJ. Necrotic enteritis predisposing factors in broiler chickens. Av Pathol.  
503 2016;45(3):275-81. Epub 2016/03/02. doi: 10.1080/03079457.2016.1150587. PubMed  
504 PMID: 26926926.

505 4. Jiang Y, Mo H, Willingham C, Wang S, Park JY, Kong W, et al. Protection  
506 Against Necrotic Enteritis in Broiler Chickens by Regulated Delayed Lysis *Salmonella*  
507 Vaccines. Av Dis. 2015;59(4):475-85. doi: 10.1637/11094-041715-Reg. PubMed PMID:  
508 26629620.

509 5. Keyburn AL, Boyce JD, Vaz P, Bannam TL, Ford ME, Parker D, et al. NetB, a  
510 new toxin that is associated with avian necrotic enteritis caused by *Clostridium*  
511 *perfringens*. PLoS pathogens. 2008;4(2):e26. PubMed PMID: 18266469.

512 6. Cooper KK, Trinh HT, Songer JG. Immunization with recombinant alpha toxin  
513 partially protects broiler chicks against experimental challenge with *Clostridium*  
514 *perfringens*. Vet Microbiol. 2009;133(1-2):92-7. Epub 2008/07/19. doi: S0378-  
515 1135(08)00215-0 [pii]

- 516 10.1016/j.vetmic.2008.06.001. PubMed PMID: 18635321.
- 517 7. Zekarias B, Mo H, Curtiss R, III. Recombinant attenuated *Salmonella enterica*  
518 serovar Typhimurium expressing the carboxy-terminal domain of alpha toxin from  
519 *Clostridium perfringens* induces protective responses against necrotic enteritis in  
520 chickens. Clin Vaccine Immunol. 2008;15(5):805-16. PubMed PMID: 18337376.
- 521 8. Kong W, Wanda SY, Zhang X, Bollen W, Tinge SA, Roland KL, et al. Regulated  
522 programmed lysis of recombinant *Salmonella* in host tissues to release protective  
523 antigens and confer biological containment. Proc Natl Acad Sci USA.  
524 2008;105(27):9361-6. PubMed PMID: 18607005.
- 525 9. Kulkarni RR, Parreira VR, Sharif S, Prescott JF. *Clostridium perfringens* antigens  
526 recognized by broiler chickens immune to necrotic enteritis. Clin Vaccine Immunol.  
527 2006;13(12):1358-62. PubMed PMID: 17065258.
- 528 10. Kulkarni RR, Parreira VR, Sharif S, Prescott JF. Immunization of broiler chickens  
529 against *Clostridium perfringens*-induced necrotic enteritis. Clin Vaccine Immunol.  
530 2007;14(9):1070-7. PubMed PMID: 17634510.
- 531 11. Shojadoost B, Vince AR, Prescott JF. The successful experimental induction of  
532 necrotic enteritis in chickens by *Clostridium perfringens*: a critical review. Vet Res.  
533 2012;43(1):74. Epub 2012/10/30. doi: 1297-9716-43-74 [pii]  
534 10.1186/1297-9716-43-74. PubMed PMID: 23101966.
- 535 12. Shams F, Oldfield NJ, Wooldridge KG, Turner DP. Fructose-1,6-bisphosphate  
536 aldolase (FBA)-a conserved glycolytic enzyme with virulence functions in bacteria: 'ill  
537 met by moonlight'. Biochem Soc Trans. 2014;42(6):1792-5. Epub 2014/11/18. doi:  
538 10.1042/BST20140203. PubMed PMID: 25399608.

- 539 13. Kawsar HI, Ohtani K, Okumura K, Hayashi H, Shimizu T. Organization and  
540 transcriptional regulation of myo-inositol operon in *Clostridium perfringens*. FEMS  
541 Microbiol Lett. 2004;235(2):289-95. Epub 2004/06/09. doi:  
542 10.1016/j.femsle.2004.04.047. PubMed PMID: 15183876.
- 543 14. Shimizu T, Shima K, Yoshino K, Yonezawa K, Shimizu T, Hayashi H. Proteome  
544 and transcriptome analysis of the virulence genes regulated by the VirR/VirS system in  
545 *Clostridium perfringens*. J, Bacteriol. 2002;184(10):2587-94. Epub 2002/04/27. PubMed  
546 PMID: 11976286; PubMed Central PMCID: PMC135029.
- 547 15. Blau K, Portnoi M, Shagan M, Kaganovich A, Rom S, Kafka D, et al. Flamingo  
548 cadherin: a putative host receptor for *Streptococcus pneumoniae*. J Infect Dis.  
549 2007;195(12):1828-37. Epub 2007/05/12. doi: 10.1086/518038. PubMed PMID:  
550 17492599.
- 551 16. Xolalpa W, Vallecillo AJ, Lara M, Mendoza-Hernandez G, Comini M, Spallek R,  
552 et al. Identification of novel bacterial plasminogen-binding proteins in the human  
553 pathogen *Mycobacterium tuberculosis*. Proteomics. 2007;7(18):3332-41. Epub  
554 2007/09/13. doi: 10.1002/pmic.200600876. PubMed PMID: 17849409.
- 555 17. Tunio SA, Oldfield NJ, Berry A, Ala'Aldeen DA, Wooldridge KG, Turner DP. The  
556 moonlighting protein fructose-1, 6-bisphosphate aldolase of *Neisseria meningitidis*:  
557 surface localization and role in host cell adhesion. Mol Micro. 2010;76(3):605-15. Epub  
558 2010/03/05. doi: 10.1111/j.1365-2958.2010.07098.x. PubMed PMID: 20199602.
- 559 18. Savva CG, Fernandes da Costa SP, Bokori-Brown M, Naylor CE, Cole AR, Moss  
560 DS, et al. Molecular architecture and functional analysis of NetB, a pore-forming toxin  
561 from *Clostridium perfringens*. J Biol Chem. 2013;288(5):3512-22. doi:

- 562 10.1074/jbc.M112.430223. PubMed PMID: 23239883; PubMed Central PMCID:  
563 PMC3561570.
- 564 19. Ling E, Feldman G, Portnoi M, Dagan R, Overweg K, Mulholland F, et al.  
565 Glycolytic enzymes associated with the cell surface of *Streptococcus pneumoniae* are  
566 antigenic in humans and elicit protective immune responses in the mouse. *Clin Exp*  
567 *Immunol.* 2004;138(2):290-8. Epub 2004/10/23. doi: CEI2628 [pii]  
568 10.1111/j.1365-2249.2004.02628.x. PubMed PMID: 15498039; PubMed Central  
569 PMCID: PMC1809218.
- 570 20. Terao Y, Okamoto S, Kataoka K, Hamada S, Kawabata S. Protective immunity  
571 against *Streptococcus pyogenes* challenge in mice after immunization with fibronectin-  
572 binding protein. *J Infect Dis.* 2005;192(12):2081-91. Epub 2005/11/17. doi:  
573 10.1086/498162. PubMed PMID: 16288371.
- 574 21. Sun Z, Shen B, Wu H, Zhou X, Wang Q, Xiao J, et al. The secreted fructose 1,6-  
575 bisphosphate aldolase as a broad spectrum vaccine candidate against pathogenic  
576 bacteria in aquaculture. *Fish Shellfish Immunol.* 2015;46(2):638-47. Epub 2015/08/11.  
577 doi: 10.1016/j.fsi.2015.08.001. PubMed PMID: 26256425.
- 578 22. Kulkarni RR, Parreira VR, Sharif S, Prescott JF. Oral immunization of broiler  
579 chickens against necrotic enteritis with an attenuated *Salmonella* vaccine vector  
580 expressing *Clostridium perfringens* antigens. *Vaccine.* 2008;26(33):4194-203. PubMed  
581 PMID: 18597901.
- 582 23. Prescott JF, Parreira VR, Mehdizadeh Gohari I, Lepp D, Gong J. The  
583 pathogenesis of necrotic enteritis in chickens: what we know and what we need to

- 584 know: a review. Avian Pathol. 2016;45(3):288-94. doi:  
585 10.1080/03079457.2016.1139688. PubMed PMID: 26813023.
- 586 24. Wade B, Keyburn AL, Haring V, Ford M, Rood JI, Moore RJ. The adherent  
587 abilities of *Clostridium perfringens* strains are critical for the pathogenesis of avian  
588 necrotic enteritis. Vet Microbiol. 2016;197:53-61. Epub 2016/12/13. doi:  
589 10.1016/j.vetmic.2016.10.028. PubMed PMID: 27938683.
- 590 25. Thompson DR, Parreira VR, Kulkarni RR, Prescott JF. Live attenuated vaccine-  
591 based control of necrotic enteritis of broiler chickens. Vet Microbiol. 2006;113(1-2):25-  
592 34. PubMed PMID: 16289639.
- 593 26. Barbara AJ, Trinh HT, Glock RD, Glenn Songer J. Necrotic enteritis-producing  
594 strains of *Clostridium perfringens* displace non-necrotic enteritis strains from the gut of  
595 chicks. Vet Microbiol. 2008;126(4):377-82. doi: 10.1016/j.vetmic.2007.07.019. PubMed  
596 PMID: 17850994.
- 597 27. Lepp D, Gong J, Songer JG, Boerlin P, Parreira VR, Prescott JF. Identification of  
598 accessory genome regions in poultry *Clostridium perfringens* isolates carrying the *netB*  
599 plasmid. J Bacteriol. 2013;195(6):1152-66. Epub 2013/01/08. doi: JB.01032-12 [pii]  
600 10.1128/JB.01032-12. PubMed PMID: 23292780; PubMed Central PMCID:  
601 PMC3592005.
- 602 28. Sizemore DR, Warner EA, Lawrence JA, Thomas LJ, Roland KL, Killeen KP.  
603 Construction and screening of attenuated  $\Delta$ *phoP/Q* *Salmonella typhimurium* vectored  
604 plague vaccine candidates. Hum Vaccin Immunother. 2012;8(3):371-83. Epub  
605 2012/02/14. doi: 18670 [pii]  
606 10.4161/hv.18670. PubMed PMID: 22327496.

- 607 29. Kang HY, Srinivasan J, Curtiss R, III. Immune responses to recombinant  
608 pneumococcal PspA antigen delivered by live attenuated *Salmonella enterica* serovar  
609 Typhimurium vaccine. *Infect Immun*. 2002;70(4):1739-49. PubMed PMID: 11895935.
- 610 30. Haghghi HR, Gong J, Gyles CL, Hayes MA, Sanei B, Parvizi P, et al. Modulation  
611 of antibody-mediated immune response by probiotics in chickens. *Clinical and*  
612 *diagnostic laboratory immunology*. 2005;12(12):1387-92. doi:  
613 10.1128/CDLI.12.12.1387-1392.2005. PubMed PMID: 16339061; PubMed Central  
614 PMCID: PMC1317071.
- 615 31. Jiang Y, Kong Q, Roland KL, Curtiss R, 3rd. Membrane vesicles of *Clostridium*  
616 *perfringens* type A strains induce innate and adaptive immunity. *International journal of*  
617 *medical microbiology : IJMM*. 2014;304(3-4):431-43. doi: 10.1016/j.ijmm.2014.02.006.  
618 PubMed PMID: 24631214.
- 619 32. Gogal RM, Jr., Ahmed SA, Larsen CT. Analysis of avian lymphocyte proliferation  
620 by a new, simple, nonradioactive assay (lympho-pro). *Avian diseases*. 1997;41(3):714-  
621 25. Epub 1997/07/01. PubMed PMID: 9356721.
- 622 33. Coursodon CF, Glock RD, Moore KL, Cooper KK, Songer JG. TpeL-producing  
623 strains of *Clostridium perfringens* type A are highly virulent for broiler chicks. *Anaerobe*.  
624 2012;18(1):117-21. Epub 2011/10/25. doi: S1075-9964(11)00198-3 [pii]  
625 10.1016/j.anaerobe.2011.10.001. PubMed PMID: 22019986.
- 626
- 627
- 628
- 629

630 Supporting information captions

631 **Figure S1.** Growth curves of the  $\chi$ 11802 vaccine strains used in this study. Strains  
632 were grown with aeration in LB supplemented with 0.1% arabinose and 0.1% mannose.  
633 A. Optical density measurements; B. Colony forming units obtained by plating onto LB +  
634 arabinose at the indicated times.

635

636 **Figure S2.** Immunofluorescence of *C. perfringens* strain CP4. Cells were incubated with  
637 pre-immune sera (Pre-Bleed), secondary antibody only (2°  $\alpha$ ) or the indicated antisera  
638 with or without prior incubation with the indicated recombinant proteins as outlined in the  
639 Materials and Methods section.

640

641

642

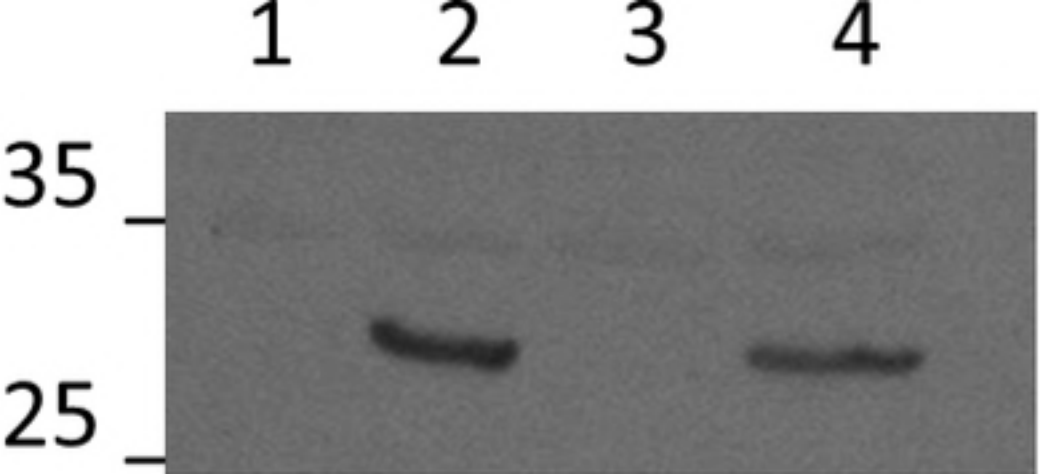

$\alpha$  FBA

**Relative intensities**

Lane 2 – 1.0

Lane 4 – 0.8

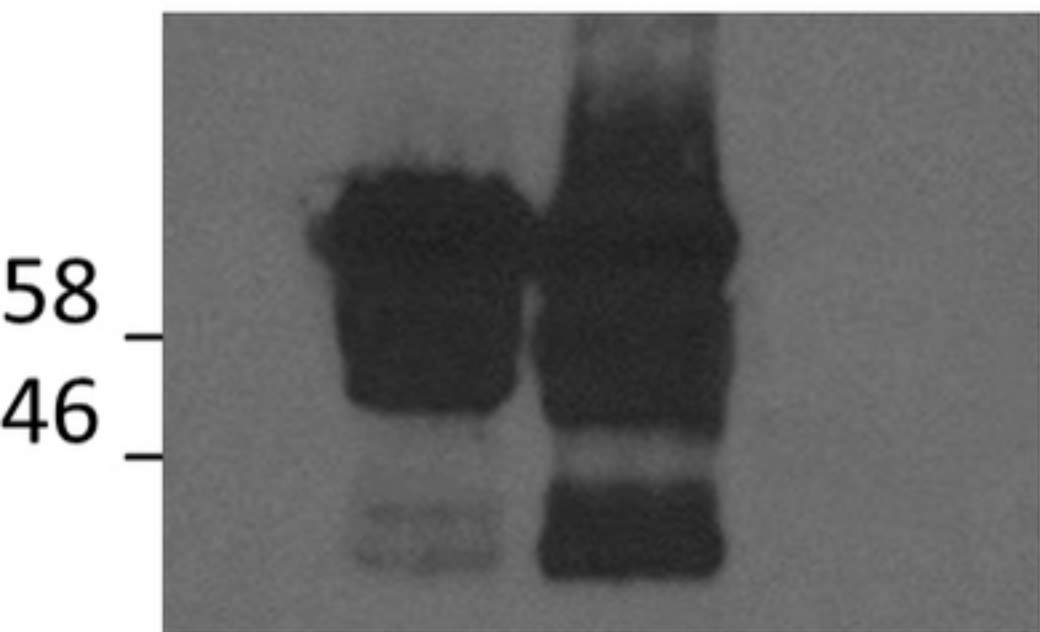

$\alpha$  NetB

Lane 2 – 1.0

Lane 3 – 1.0

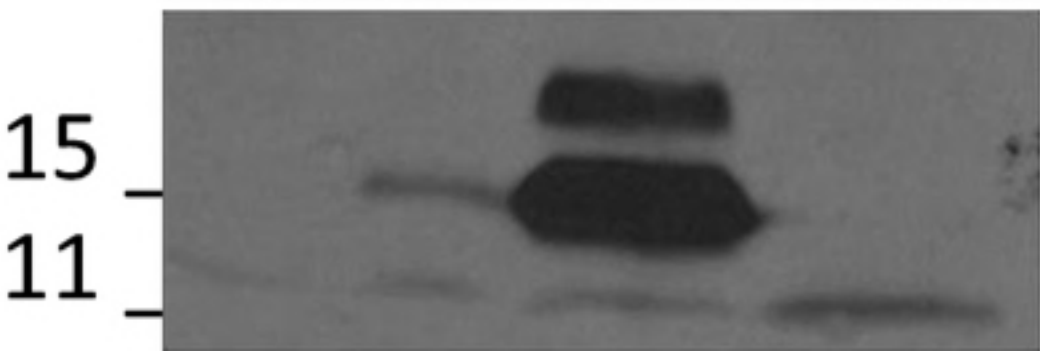

$\alpha$  Plc

Lane 2 – 1.0

Lane 3 – 6.0



**A.****Log<sub>2</sub> Titer Serum IgY** $2^{11}$   
 $2^{10}$   
 $2^9$   
 $2^8$   
 $2^7$ **FBA****NetB****PlcC**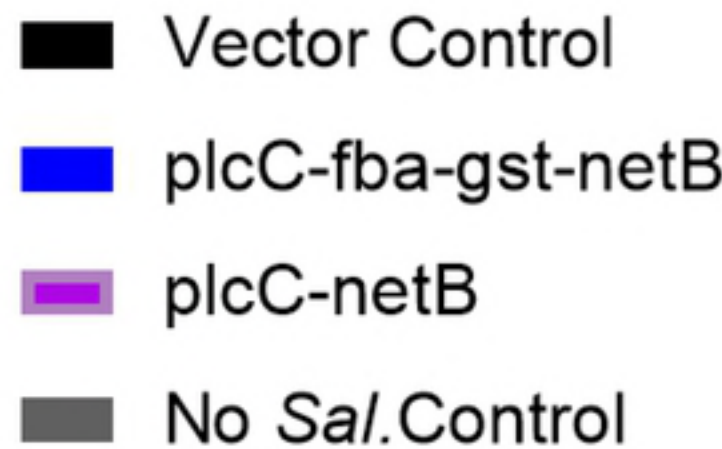

B.

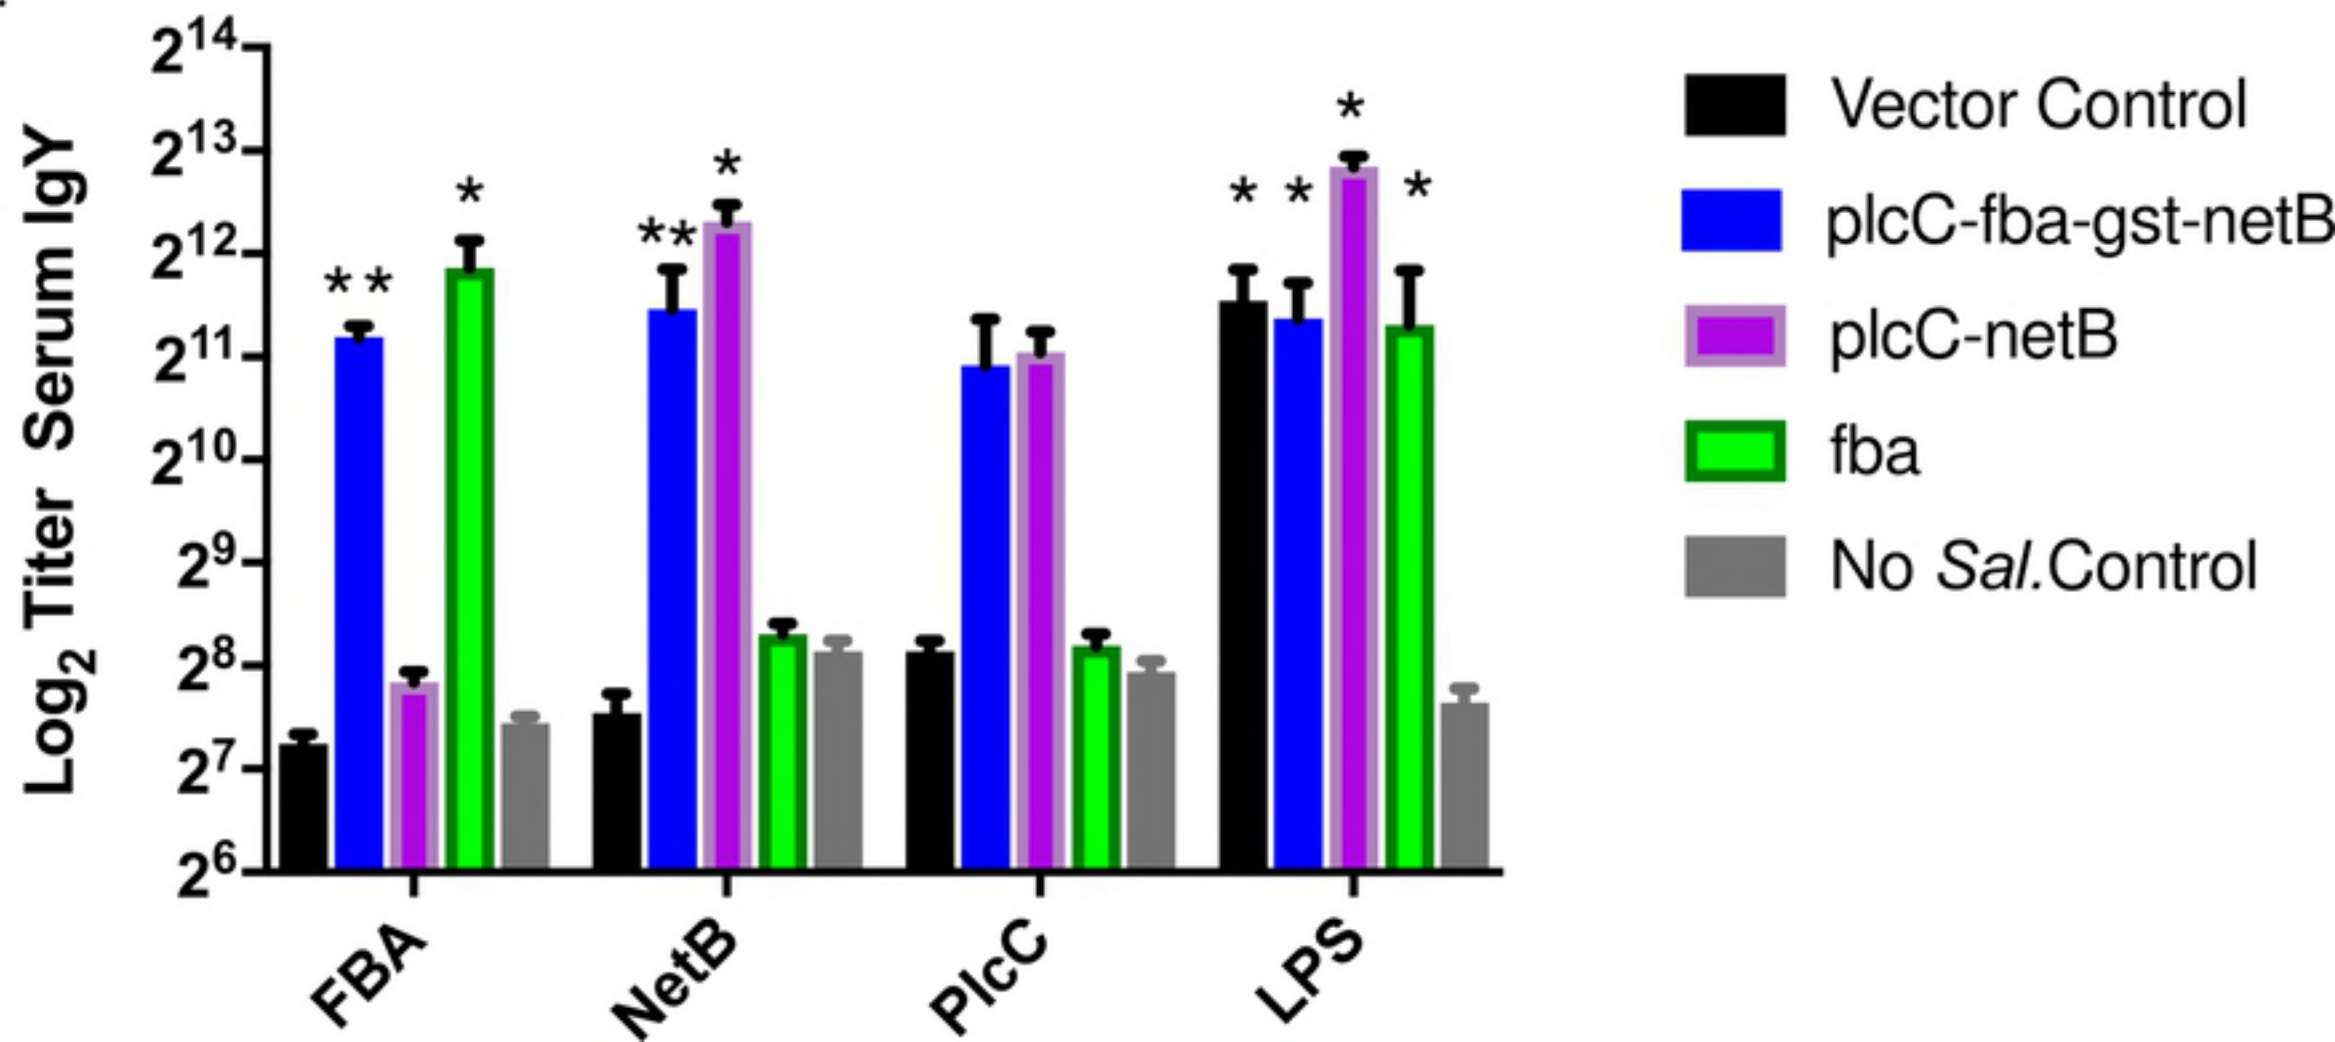

Intestinal IgY

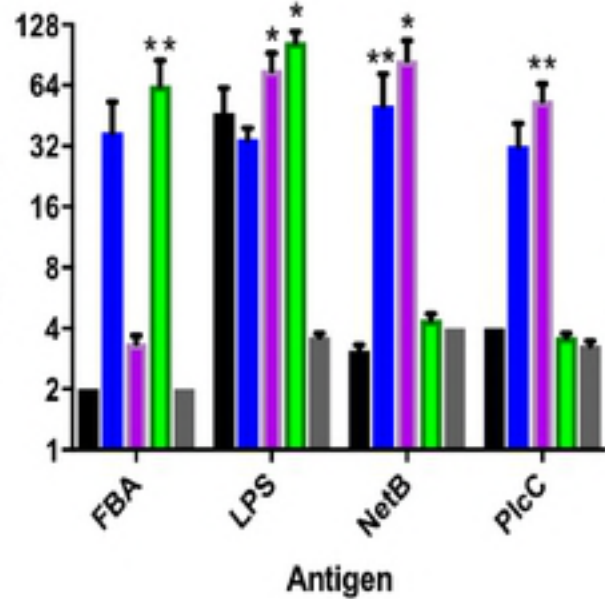

Intestinal IgM

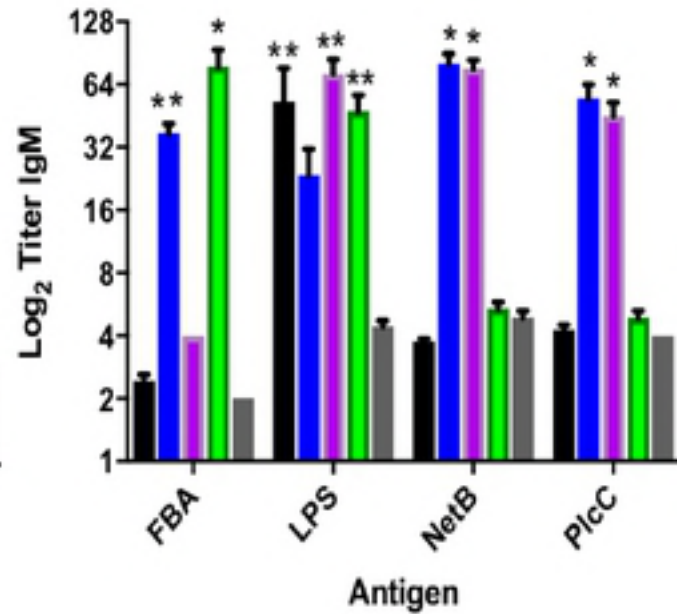

Intestinal IgA

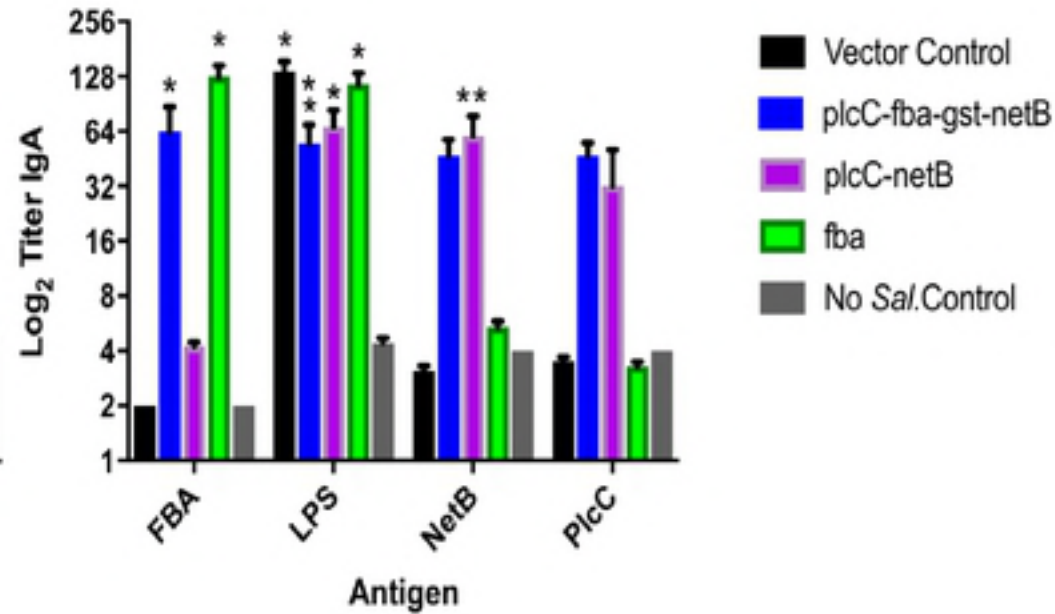

### Splenocytes

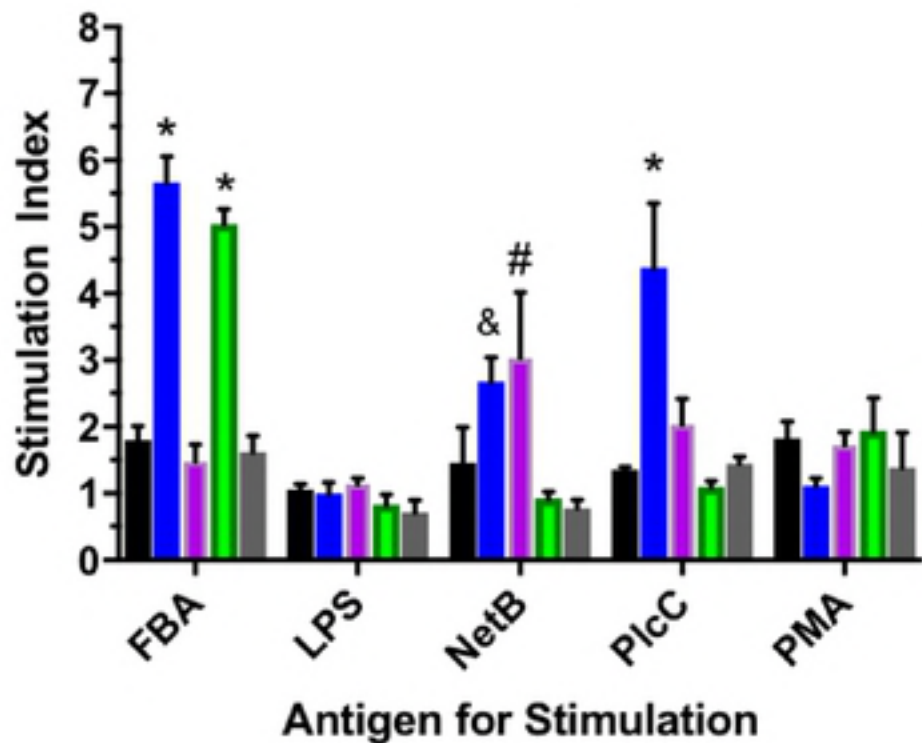

### Lymphocytes

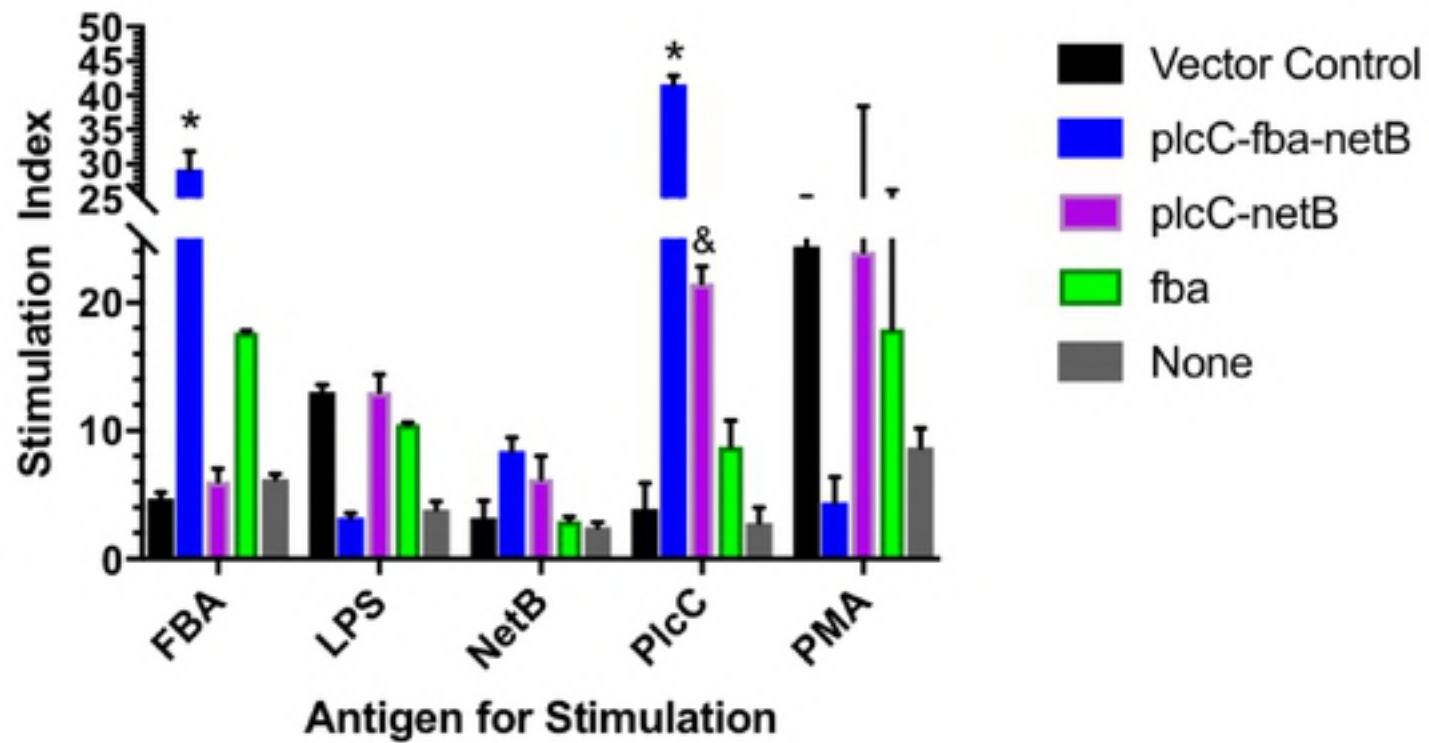

- Vector Control
- plcC-fba-netB
- plcC-netB
- fba
- None



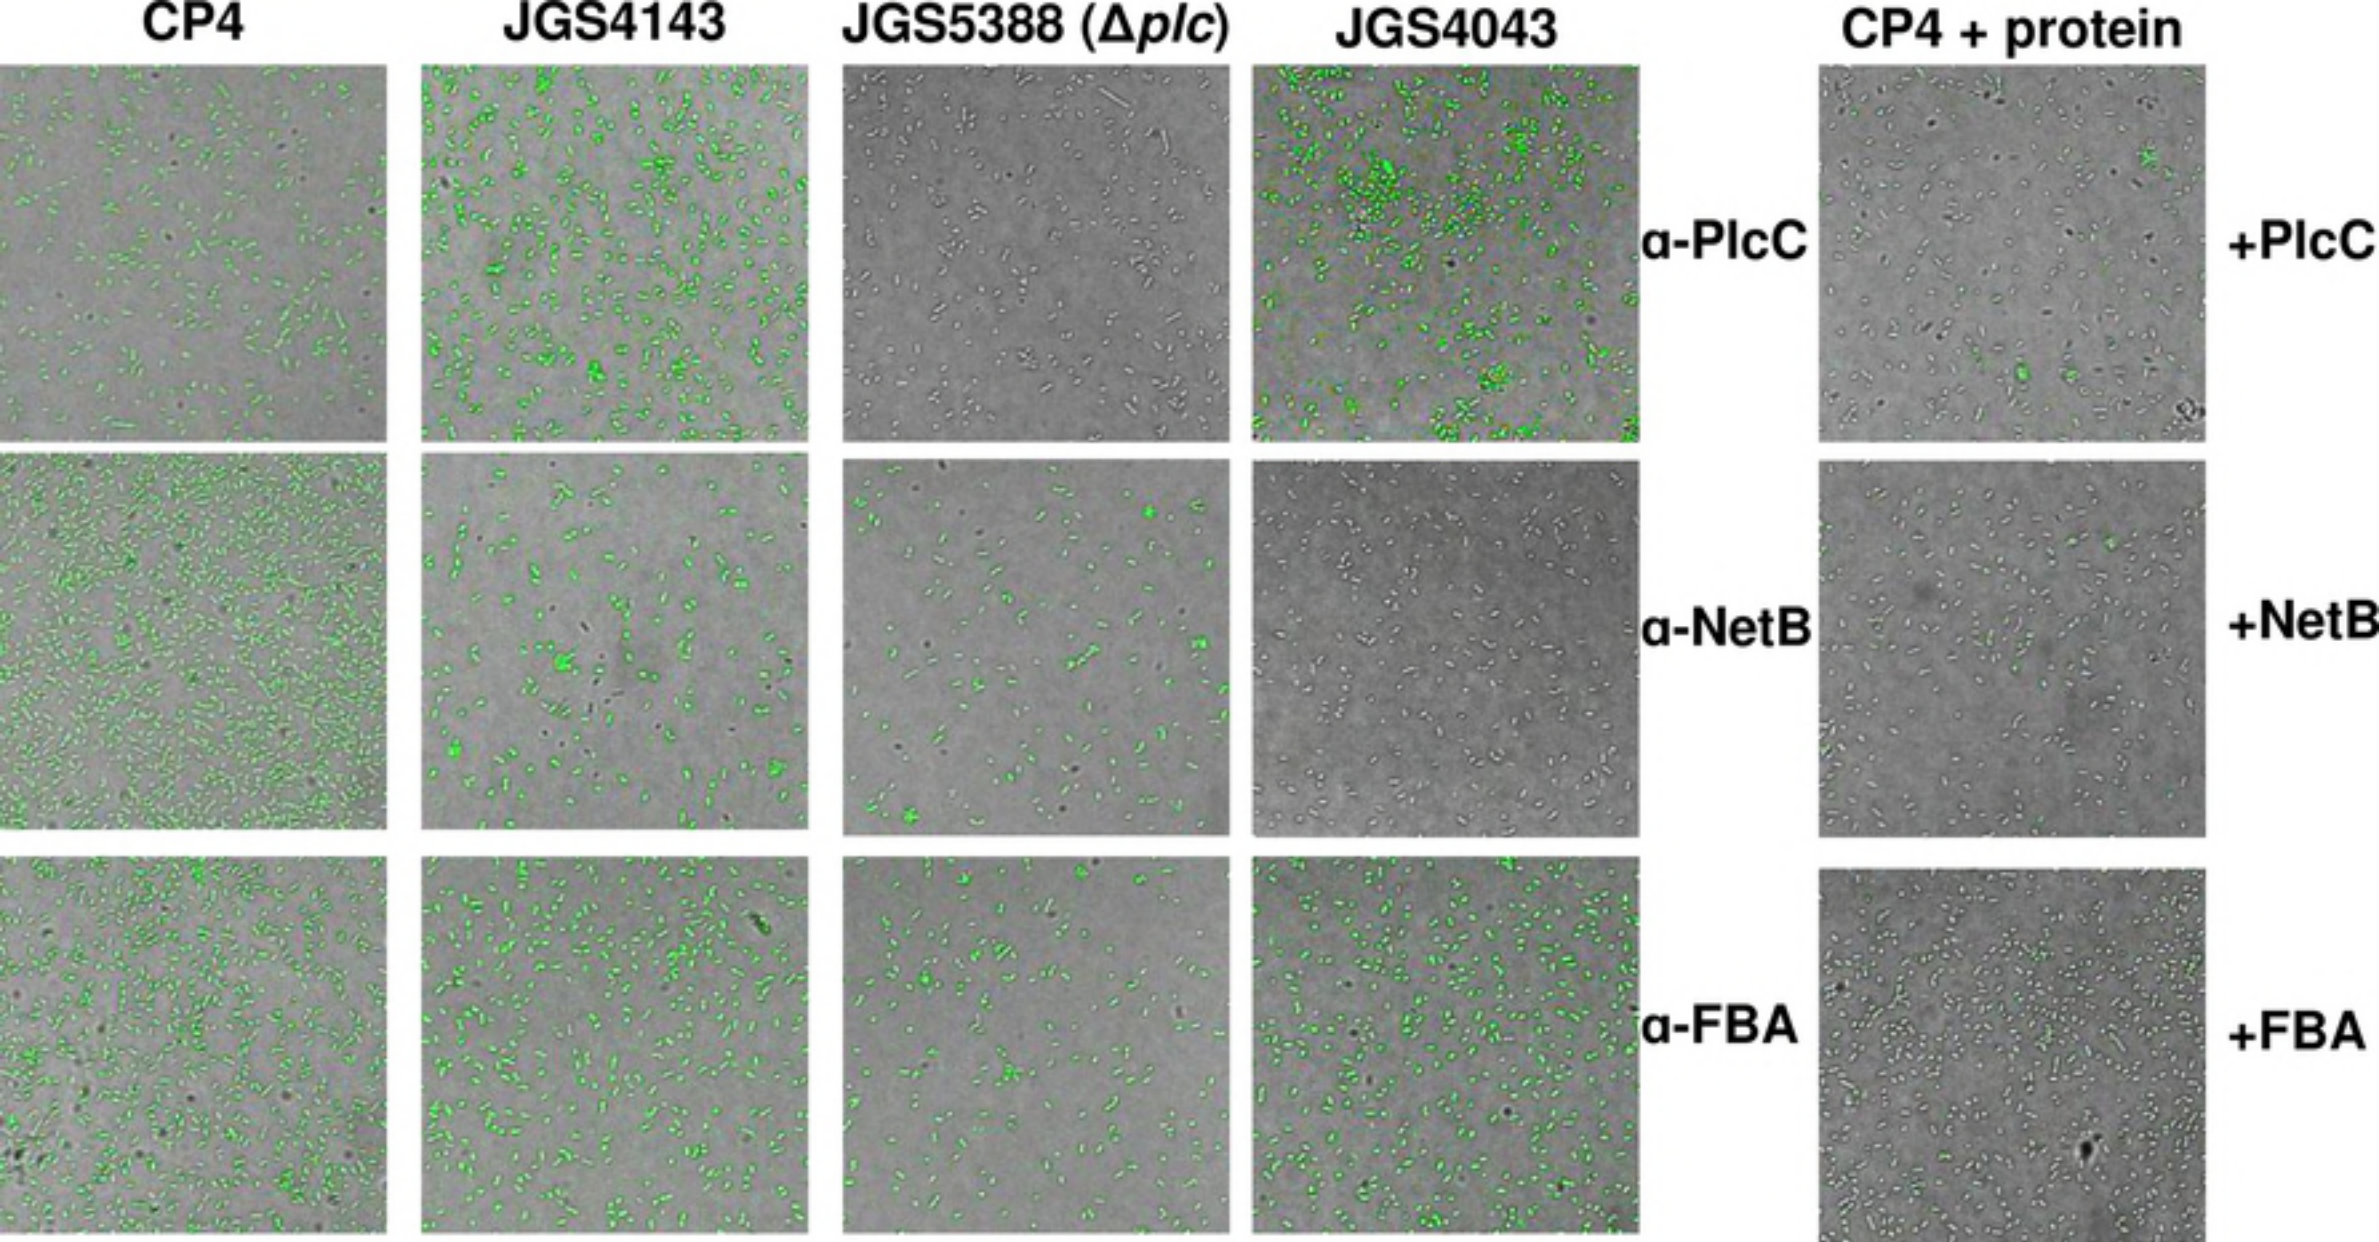

0  $\mu$ m 100

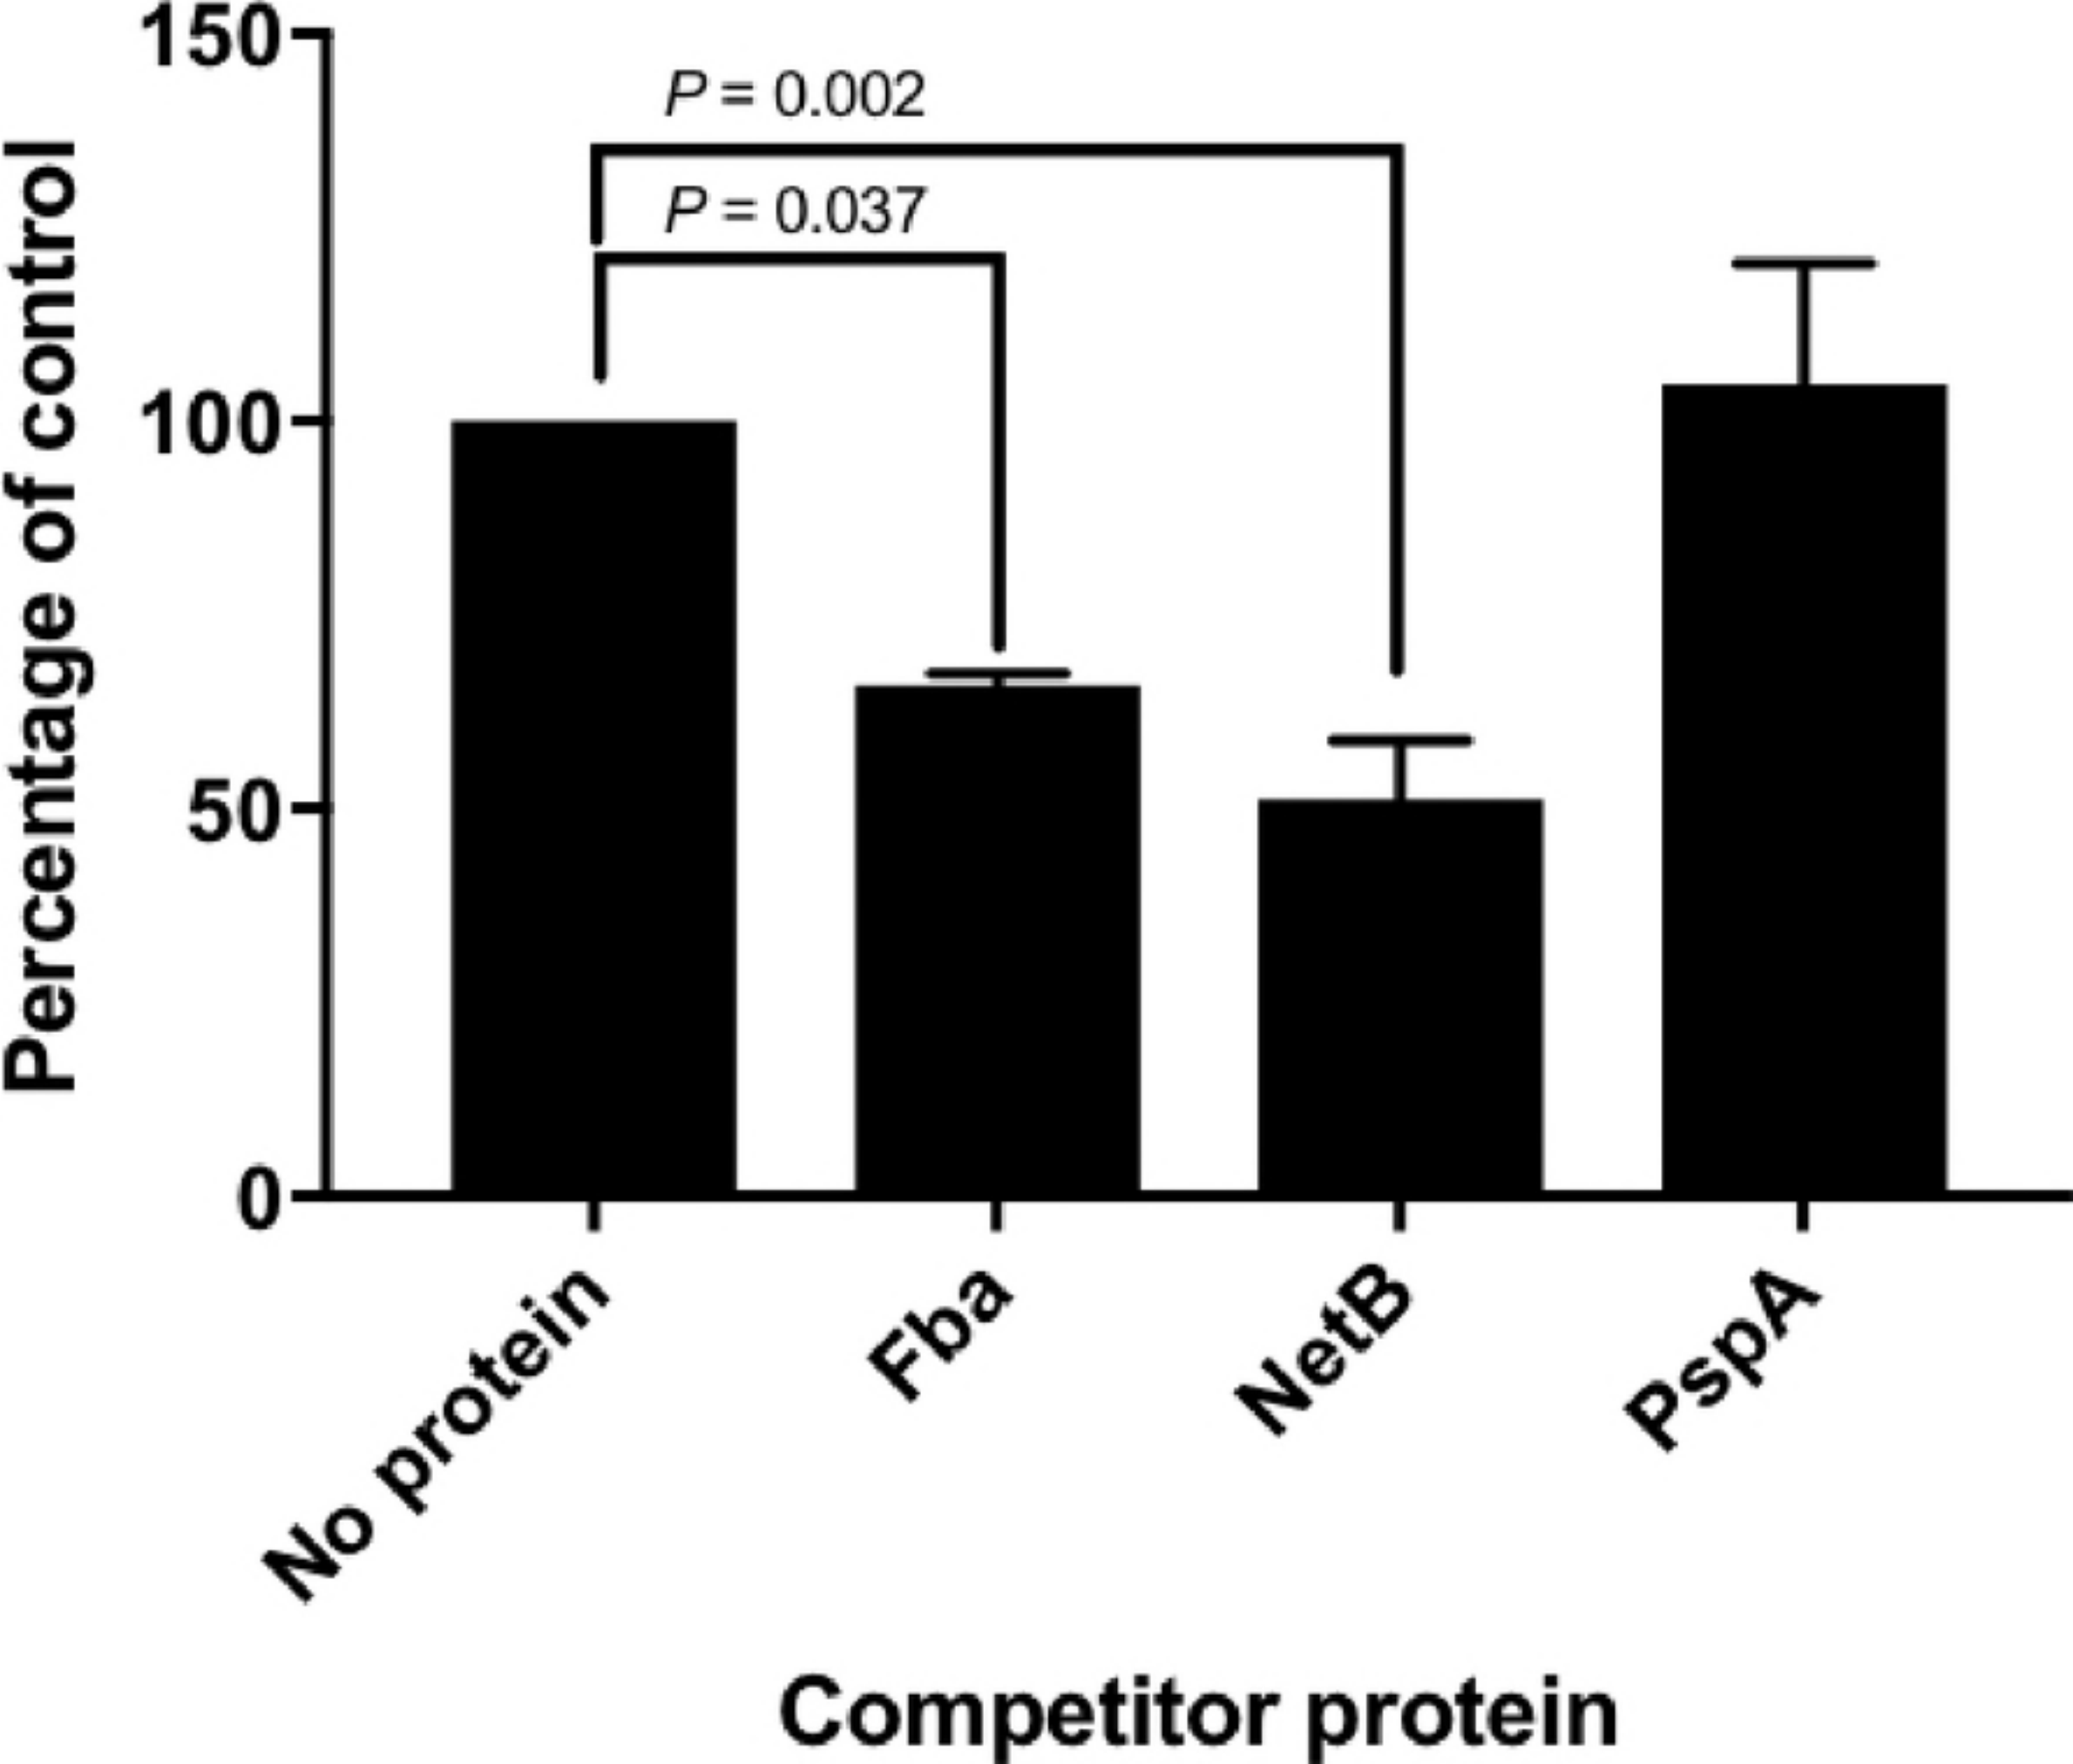

Source: https://www.biorxiv.org/content/10.1101/318469v1.full.pdf
